# Supplementary material for: The mRNA-1273 Vaccine Induces Cross-Variant Antibody Responses to SARS-CoV-2 With Distinct Profiles in Individuals With or Without Pre-Existing Immunity
Source: PubMed Central journal article supplement (PMC8446508; doi:10.3389/fimmu.2021.737083), 2021-09-03
Supplement: DataSheet_1.pdf [file DataSheet_1.pdf]

## Supplementary Material

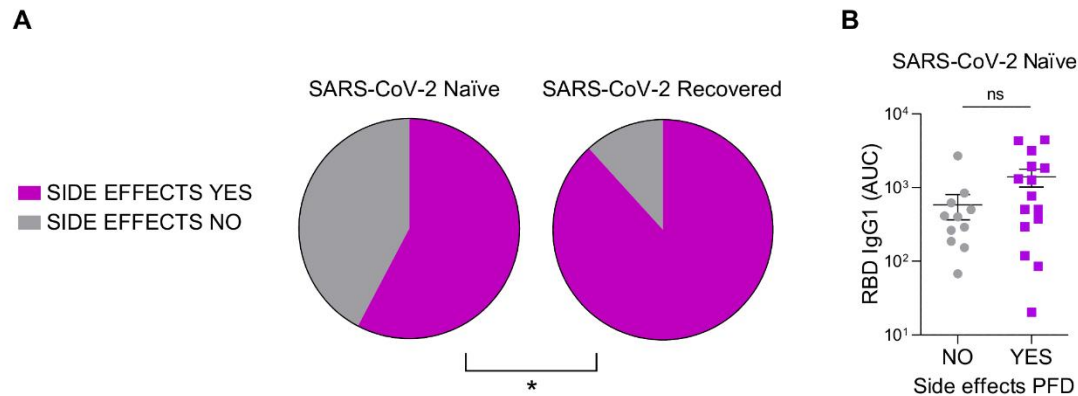

**Supplementary Figure 1. SARS-CoV-2 recovered individuals experience side effects in higher proportion that naïve individuals upon primary immunization.** (A) Distribution of SARS-CoV-2 naïve (left) and recovered (right) individuals that experienced side effects upon primary immunization. SARS-CoV-2 naïve individuals: side effects yes ( $n=15$ ), side effects no ( $n=11$ ). SARS-CoV-2 recovered individuals: side effects yes ( $n=15$ ), side effects no ( $n=2$ ). Fisher's exact test, two-sided, was performed to compare the distribution of SARS-CoV-2 naïve and recovered individuals with side effects. (B) AUC for the RBD-specific IgG1 subclass analyzed from SARS-CoV-2 naïve individuals segregated according to the presence (YES) or absence (NO) of side effects upon primary immunization. Bars represent mean  $\pm$  standard error mean (SEM). Two-tailed Mann-Whitney U test was performed to compare antibody responses in naïve individuals with and without side effects (ns, non-significant ( $P > 0.05$ ), \* $P < 0.05$ , \*\* $P < 0.01$ , \*\*\* $P < 0.001$ , and \*\*\*\* $P < 0.0001$ ). SARS-CoV-2 naïve,  $n=26$ ; SARS CoV-2 recovered,  $n=17$ .

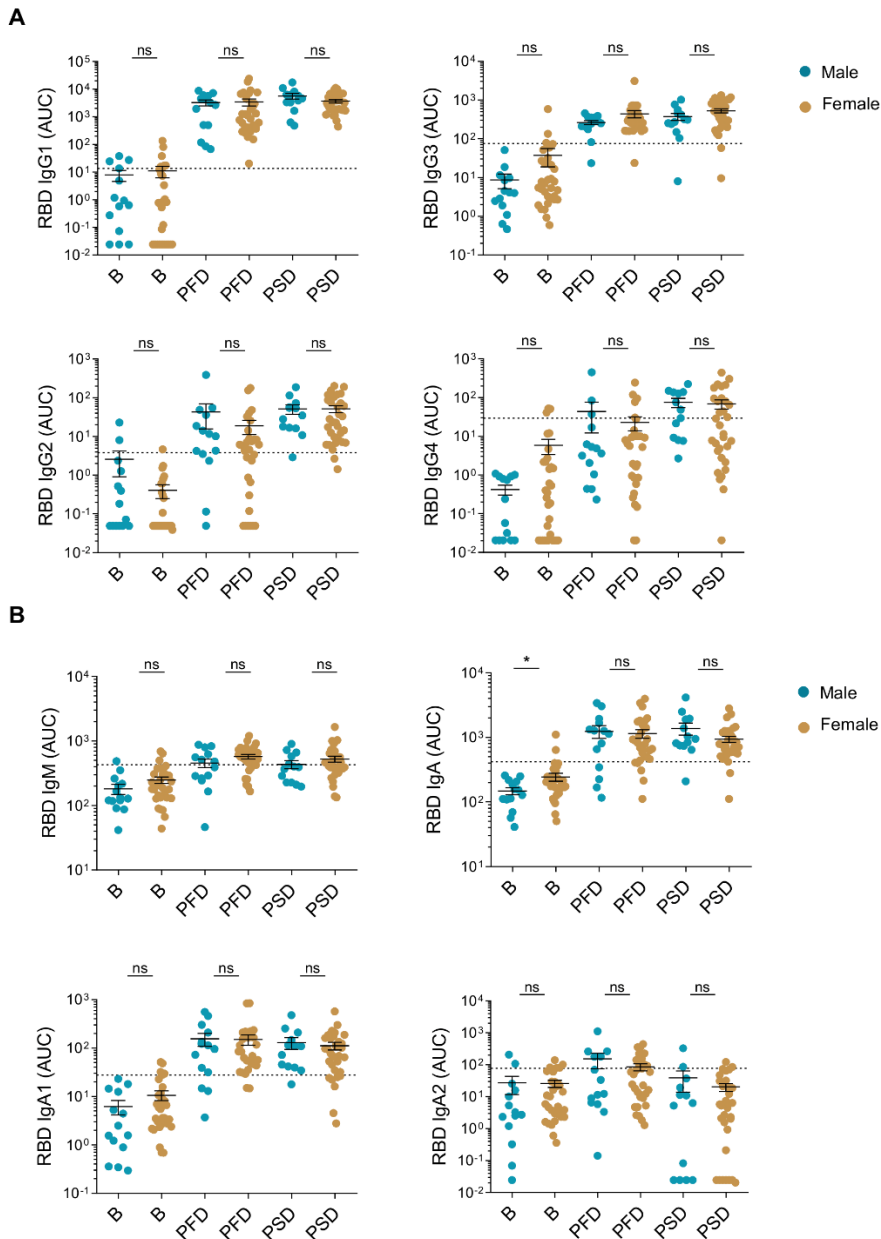

**Supplementary Figure 2. mRNA-1273 vaccination induces antibody responses irrespective of the gender of the individuals.** (A) Area under the curve (AUC) for each of the WT RBD-specific IgG subclasses analyzed from male and female individuals overtime. (B) Area under the curve (AUC) for each of the WT RBD-specific IgM, IgA and IgA subclasses analyzed from male and female individuals overtime. SARS-CoV-2 naïve individuals at baseline were used to establish negative threshold values defined as the naïve AUC mean plus 2 times the standard deviation of the mean. Bars represent mean  $\pm$  standard error mean (SEM). Dashed line indicates negative threshold. Data are presented as individual dots. Two-tailed Mann-Whitney U test was performed to compare antibody responses between male and female (ns, non-significant ( $P > 0.05$ ), \* $P < 0.05$ , \*\* $P < 0.01$ , and \*\*\* $P < 0.001$ ). Male,  $n=14$ ; Female,  $n=32$ .

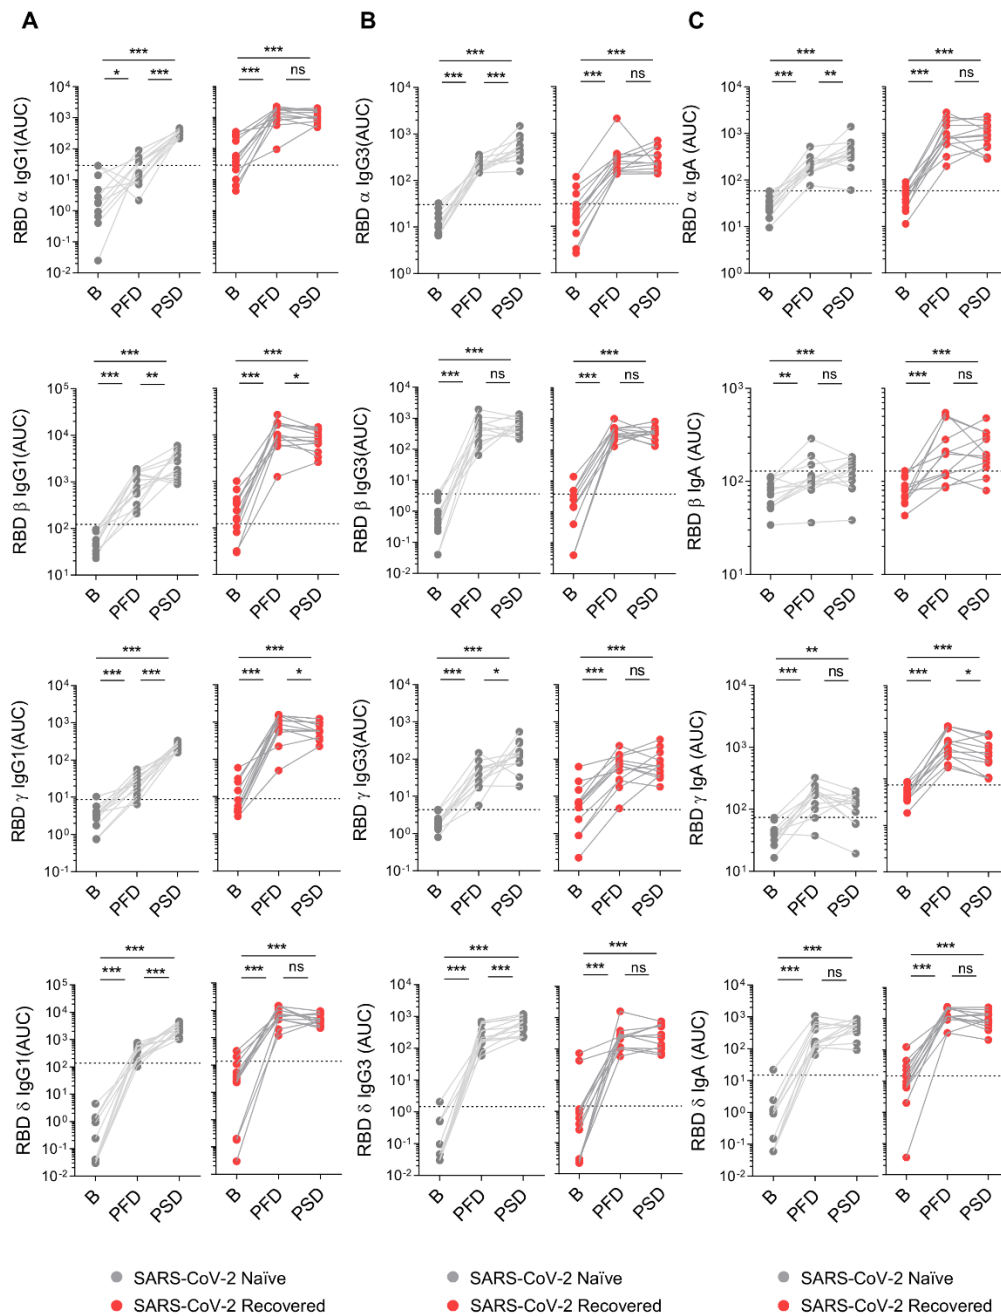

**Supplementary Figure 3. mRNA-1273 vaccination does not trigger a recall response in SARS-CoV-2 recovered individuals against the variants of concern.** (A) AUC for IgG1, (B) IgG3, and (C) IgA antibodies against the RBD of  $\alpha$ ,  $\beta$ ,  $\gamma$  and  $\delta$  variants analyzed from SARS-CoV-2 naïve (left) and recovered (right) individuals overtime. Sera from SARS-CoV-2 naïve individuals at baseline were used to establish negative threshold values defined as the naïve AUC mean plus 2 times the standard deviation of the mean. Dashed line indicates negative threshold. Data are presented as individual dots. Wilcoxon matched pairs test was performed to compare time points (ns, non-significant ( $P > 0.05$ ), \* $P < 0.05$ , \*\* $P < 0.01$ , \*\*\* $P < 0.001$ , and \*\*\*\* $P < 0.0001$ ). SARS-CoV-2 naïve,  $n=12$ ; SARS CoV-2 recovered,  $n=12$ .
